# Supplementary material
Source: PubMed Central journal article supplement (PMC3033054)
Supplement: me.2010-0202_1.pdf [file me.2010-0202_1.pdf]

# SUPPLEMENTAL INFORMATION

## ME-10-0202

### ANALYSIS OF AGONIST AND ANTAGONIST EFFECTS ON THYROID RECEPTOR CONFORMATION BY HYDROGEN/DEUTERIUM-EXCHANGE

*Figueira, A.C.M.<sup>‡</sup>, Saidenberg, D.M.<sup>\*</sup>, Souza, P. C. T.<sup>x</sup>, Martinez, L.<sup>x</sup>, Scanlan T.S.<sup>y</sup>, Baxter, J. D.<sup>‡</sup>, Skaf, M. S.<sup>x</sup>, Palma, M. S.<sup>\*</sup>, Webb, P.<sup>‡</sup> and Polikarpov, I.<sup>‡#¶</sup>*

<sup>‡</sup>Laboratório de Cristalografia de Proteínas, Instituto de Física de São Carlos, Universidade de São Paulo (USP), São Carlos, SP, Brazil. <sup>\*</sup>Departamento de Biologia, CEIS/IBRC, Universidade Estadual Paulista (UNESP), Rio Claro, SP, Brazil. <sup>x</sup>Institute of Chemistry, State University of Campinas (UNICAMP), Campinas, SP, Brazil. <sup>y</sup>Department of Physiology & Pharmacology, Oregon Health & Science University, Portland, Oregon, USA. <sup>‡</sup>Diabetes Center and Cancer Research Unit, Methodist Hospital, Houston, Texas, USA.

**Configuration files:** Atomic coordinates and configuration files for molecular dynamics simulations are available upon request to authors.

**Figure 1** - Figure S1 Deuterium (D<sub>2</sub>O) incorporation for each peptide from peptic cleavage of Apo-TR, TR+NH<sub>3</sub> and TR+T<sub>3</sub>, in all incubation time (1min, 3min, 8min, 15min, 1h, 3h and 5h).

**Figure 2:** Further comparison between holo and apo structures obtained from the 298 K annealed simulations. **A.** Details of the dimerization surface shows significant changes in the H7, H8, and especially in H11, when compared to the annealed structures (I, red, II / III blue) with the structure of holo-TR (gray). The H11 is broken in two, with its C-terminal part occupying part of the empty LBP, which increases the contact of hydrophobic residues. The region N-terminal H11 breaks with the displacement of the C-terminal, also changing the dimerization region. Helices H9 and H10 are unchanged. **B.** In the absence of the ligand, the LBP reduces volume, with the polar residues that make interactions with the ligand being exposed to solvent. As an example, this picture shows the changes observed in H435, the most buried polar residue in the LBP. In the holo structure, H435 interacts directly with the ligand. In the transition structure I, the volume of hydrophobic cavity is smaller but still contains H435. In structures II/III, where H12 is already in the inactive position, the side chain of H435 leaves the the hydrophobic region to make full contact with the solvent. **C.** Number of water molecules in the first solvation shell around the C-terminal part of H3 (N<sub>w</sub> - H3). The MD simulations clearly show a lower hydration of H3 in the annealed apo structures (I and II/III), consistent with that observed experimentally.

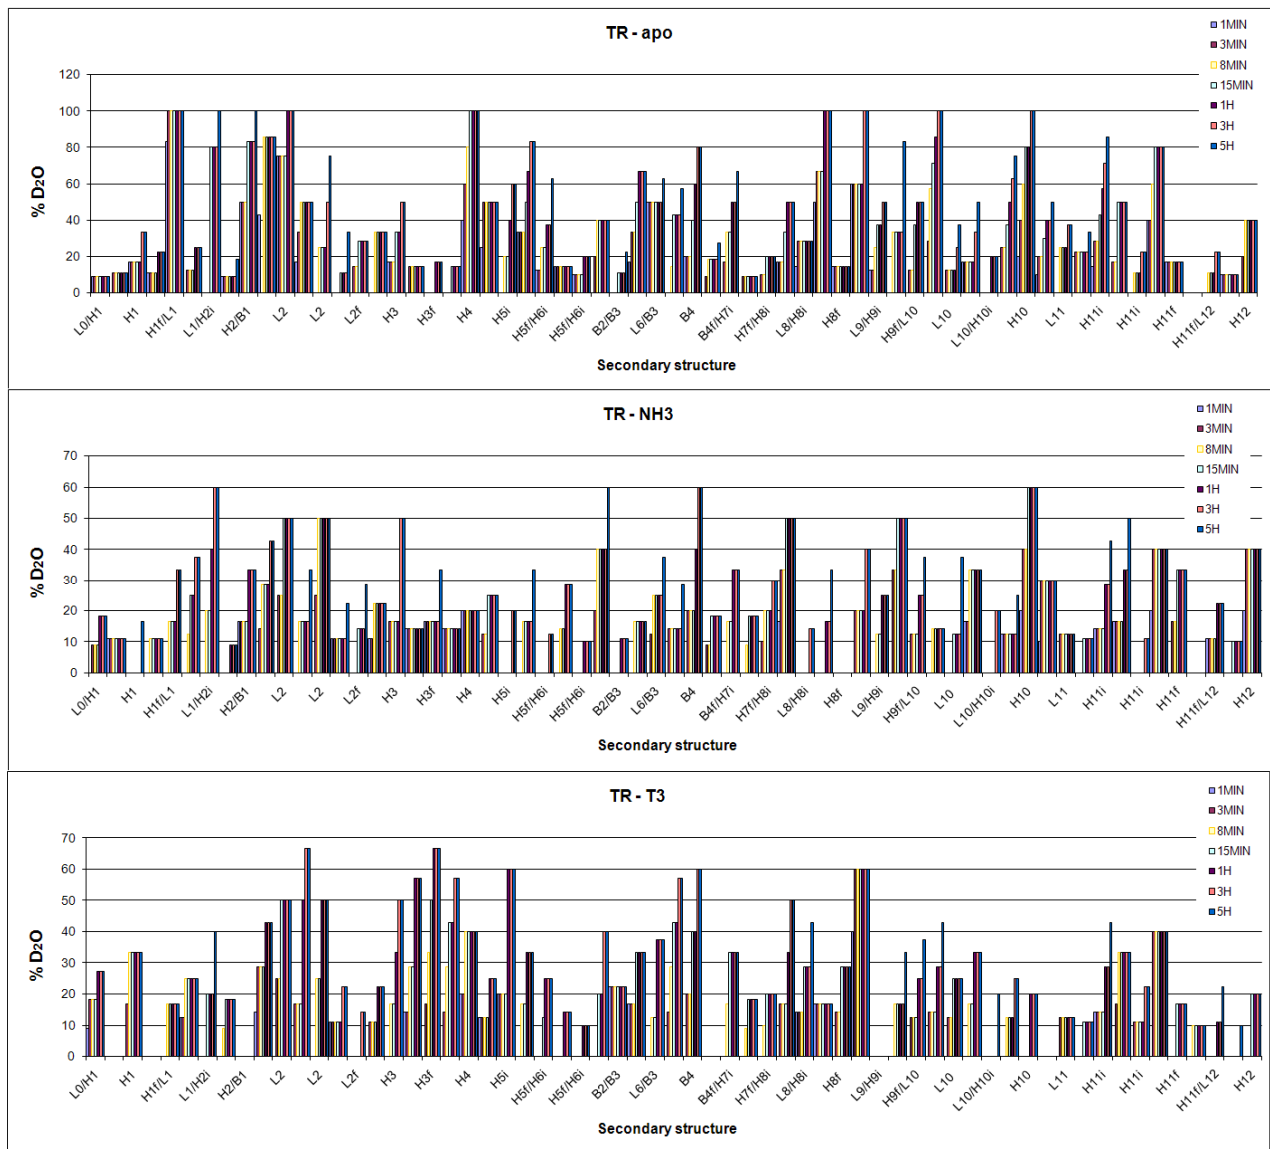

Figure 1

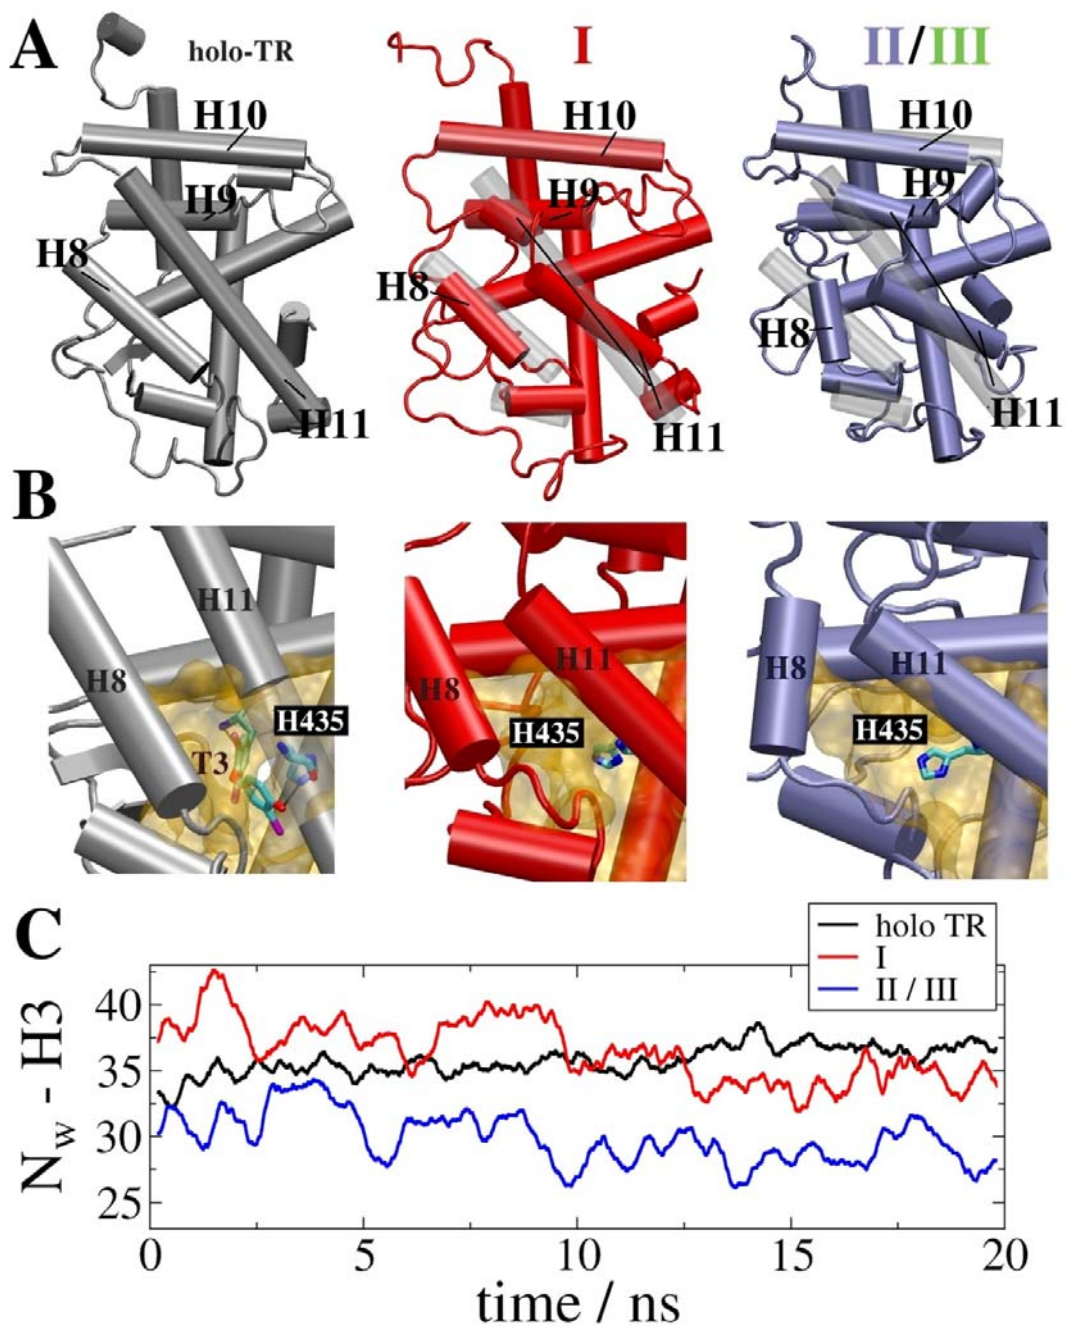

Figure 2
